# Supplementary material
Source: publisher figshare collection journal article supplement (https://gsajournals.figshare.com/ndownloader/files/14675402)
Supplement: Supplementary file 1 [file 14675402]

## Sheet: #3
frame	time	PC	TB	ant isth	mid isth	post isth
1	00:00:00
2	00:00:00.039000
3	00:00:00.079000
4	00:00:00.130000
5	00:00:00.170000
6	00:00:00.210000
7	00:00:00.250000
8	00:00:00.290000
9	00:00:00.330000
10	00:00:00.370000
11	00:00:00.410000
12	00:00:00.450000
13	00:00:00.490000
14	00:00:00.530000
15	00:00:00.570000
16	00:00:00.610000
17	00:00:00.650000
18	00:00:00.690000
19	00:00:00.711000
20	00:00:00.751000
21	00:00:00.790000
22	00:00:00.830000
23	00:00:00.869000
24	00:00:00.909000
25	00:00:00.948000
26	00:00:00.988000
27	00:00:01.027000
28	00:00:01.067000
29	00:00:01.106000
30	00:00:01.146000
31	00:00:01.185000
32	00:00:01.225000
33	00:00:01.264000
34	00:00:01.304000
35	00:00:01.343000
36	00:00:01.383000
37	00:00:01.422000
38	00:00:01.462000
39	00:00:01.501000
40	00:00:01.541000
41	00:00:01.580000
42	00:00:01.620000
43	00:00:01.659000
44	00:00:01.699000
45	00:00:01.739000
46	00:00:01.778000
47	00:00:01.818000
48	00:00:01.858000
49	00:00:01.898000
50	00:00:01.937000
51	00:00:01.977000
52	00:00:02.016000
53	00:00:02.056000
54	00:00:02.095000
55	00:00:02.135000
56	00:00:02.174000
57	00:00:02.214000
58	00:00:02.253000
59	00:00:02.293000
60	00:00:02.332000
61	00:00:02.372000
62	00:00:02.411000
63	00:00:02.451000
64	00:00:02.490000
65	00:00:02.530000
66	00:00:02.569000
67	00:00:02.609000
68	00:00:02.648000
69	00:00:02.688000
70	00:00:02.727000
71	00:00:02.767000
72	00:00:02.806000
73	00:00:02.846000
74	00:00:02.885000
75	00:00:02.925000
76	00:00:02.964000
77	00:00:03.004000
78	00:00:03.043000
79	00:00:03.083000
80	00:00:03.122000
81	00:00:03.162000
82	00:00:03.201000
83	00:00:03.241000
84	00:00:03.281000
85	00:00:03.320000
86	00:00:03.360000
87	00:00:03.399000
88	00:00:03.439000
89	00:00:03.478000
90	00:00:03.518000
91	00:00:03.557000
92	00:00:03.597000
93	00:00:03.636000
94	00:00:03.676000
95	00:00:03.715000
96	00:00:03.755000
97	00:00:03.794000
98	00:00:03.834000
99	00:00:03.873000
100	00:00:03.913000
101	00:00:03.952000
102	00:00:03.992000
103	00:00:04.031000
104	00:00:04.071000
105	00:00:04.110000
106	00:00:04.150000
107	00:00:04.189000
108	00:00:04.229000
109	00:00:04.268000
110	00:00:04.308000
111	00:00:04.347000
112	00:00:04.387000
113	00:00:04.426000
114	00:00:04.466000
115	00:00:04.505000
116	00:00:04.545000
117	00:00:04.584000
118	00:00:04.624000
119	00:00:04.663000
120	00:00:04.703000
121	00:00:04.742000
122	00:00:04.782000
123	00:00:04.822000
124	00:00:04.861000
125	00:00:04.901000
126	00:00:04.940000
127	00:00:04.980000
128	00:00:05.019000
129	00:00:05.059000
130	00:00:05.098000
131	00:00:05.138000
132	00:00:05.178000
133	00:00:05.218000
134	00:00:05.257000
135	00:00:05.297000
136	00:00:05.336000
137	00:00:05.376000
138	00:00:05.415000
139	00:00:05.455000
140	00:00:05.494000
141	00:00:05.534000
142	00:00:05.573000
143	00:00:05.613000
144	00:00:05.652000
145	00:00:05.692000
146	00:00:05.731000
147	00:00:05.771000
148	00:00:05.810000
149	00:00:05.850000
150	00:00:05.889000
151	00:00:05.929000
152	00:00:05.968000
153	00:00:06.008000
154	00:00:06.047000
155	00:00:06.087000
156	00:00:06.126000
157	00:00:06.166000
158	00:00:06.205000
159	00:00:06.245000
160	00:00:06.284000
161	00:00:06.324000
162	00:00:06.363000
163	00:00:06.403000
164	00:00:06.442000
165	00:00:06.482000
166	00:00:06.521000
167	00:00:06.561000
168	00:00:06.601000
169	00:00:06.640000
170	00:00:06.680000
171	00:00:06.719000
172	00:00:06.759000
173	00:00:06.798000
174	00:00:06.838000
175	00:00:06.877000
176	00:00:06.917000
177	00:00:06.956000
178	00:00:06.996000
179	00:00:07.035000
180	00:00:07.075000
181	00:00:07.114000
182	00:00:07.154000
183	00:00:07.193000
184	00:00:07.233000
185	00:00:07.272000
186	00:00:07.312000
187	00:00:07.351000
188	00:00:07.391000
189	00:00:07.430000
190	00:00:07.470000
191	00:00:07.509000
192	00:00:07.549000
193	00:00:07.588000
194	00:00:07.628000
195	00:00:07.667000
196	00:00:07.707000
197	00:00:07.746000
198	00:00:07.786000
199	00:00:07.825000
200	00:00:07.865000
201	00:00:07.904000
202	00:00:07.944000
203	00:00:07.983000
204	00:00:08.023000
205	00:00:08.062000
206	00:00:08.102000
207	00:00:08.142000
208	00:00:08.181000
209	00:00:08.221000
210	00:00:08.260000
211	00:00:08.300000
212	00:00:08.339000
213	00:00:08.379000
214	00:00:08.418000
215	00:00:08.458000
216	00:00:08.498000
217	00:00:08.538000
218	00:00:08.577000
219	00:00:08.617000
220	00:00:08.656000
221	00:00:08.696000
222	00:00:08.735000
223	00:00:08.775000
224	00:00:08.814000
225	00:00:08.854000
226	00:00:08.893000
227	00:00:08.933000
228	00:00:08.972000
229	00:00:09.012000
230	00:00:09.051000
231	00:00:09.091000
232	00:00:09.130000
233	00:00:09.170000
234	00:00:09.209000
235	00:00:09.249000
236	00:00:09.288000
237	00:00:09.328000
238	00:00:09.367000
239	00:00:09.407000
240	00:00:09.446000
241	00:00:09.486000
242	00:00:09.525000
243	00:00:09.565000
244	00:00:09.605000
245	00:00:09.644000
246	00:00:09.684000
247	00:00:09.723000
248	00:00:09.763000
249	00:00:09.802000
250	00:00:09.841000
251	00:00:09.881000
252	00:00:09.921000
253	00:00:09.960000
254	00:00:10
255	00:00:10.039000
256	00:00:10.079000
257	00:00:10.118000
258	00:00:10.158000
259	00:00:10.197000
260	00:00:10.237000
261	00:00:10.276000
262	00:00:10.316000
263	00:00:10.355000
264	00:00:10.395000
265	00:00:10.434000
266	00:00:10.474000
267	00:00:10.513000
268	00:00:10.553000
269	00:00:10.592000
270	00:00:10.632000
271	00:00:10.671000
272	00:00:10.711000
273	00:00:10.750000
274	00:00:10.790000
275	00:00:10.829000
276	00:00:10.869000
277	00:00:10.908000
278	00:00:10.948000
279	00:00:10.987000
280	00:00:11.027000
281	00:00:11.066000
282	00:00:11.106000
283	00:00:11.145000
284	00:00:11.185000
285	00:00:11.224000
286	00:00:11.264000
287	00:00:11.303000
288	00:00:11.343000
289	00:00:11.382000
290	00:00:11.422000
291	00:00:11.462000
292	00:00:11.501000
293	00:00:11.541000
294	00:00:11.580000
295	00:00:11.620000
296	00:00:11.659000
297	00:00:11.699000
298	00:00:11.738000
299	00:00:11.778000
300	00:00:11.817000
301	00:00:11.858000
302	00:00:11.897000
303	00:00:11.937000
304	00:00:11.976000
305	00:00:12.016000
306	00:00:12.055000
307	00:00:12.095000
308	00:00:12.134000
309	00:00:12.174000
310	00:00:12.213000
311	00:00:12.253000
312	00:00:12.292000
313	00:00:12.332000
314	00:00:12.371000
315	00:00:12.411000
316	00:00:12.450000
317	00:00:12.490000
318	00:00:12.529000
319	00:00:12.569000
320	00:00:12.608000
321	00:00:12.648000
322	00:00:12.687000
323	00:00:12.727000
324	00:00:12.766000
325	00:00:12.806000
326	00:00:12.845000
327	00:00:12.885000
328	00:00:12.925000
329	00:00:12.964000
330	00:00:13.004000
331	00:00:13.043000
332	00:00:13.083000
333	00:00:13.122000
334	00:00:13.162000
335	00:00:13.201000
336	00:00:13.241000
337	00:00:13.280000
338	00:00:13.320000
339	00:00:13.359000
340	00:00:13.399000
341	00:00:13.438000
342	00:00:13.478000
343	00:00:13.517000
344	00:00:13.557000
345	00:00:13.596000
346	00:00:13.636000
347	00:00:13.675000
348	00:00:13.715000
349	00:00:13.754000
350	00:00:13.794000
351	00:00:13.833000
352	00:00:13.873000
353	00:00:13.912000
354	00:00:13.952000
355	00:00:13.991000
356	00:00:14.031000
357	00:00:14.070000
358	00:00:14.110000
359	00:00:14.149000
360	00:00:14.189000
361	00:00:14.228000
362	00:00:14.268000
363	00:00:14.307000
364	00:00:14.347000
365	00:00:14.386000
366	00:00:14.426000
367	00:00:14.466000
368	00:00:14.505000
369	00:00:14.545000
370	00:00:14.584000
371	00:00:14.624000
372	00:00:14.663000
373	00:00:14.703000
374	00:00:14.742000
375	00:00:14.782000
376	00:00:14.821000
377	00:00:14.861000
378	00:00:14.900000
379	00:00:14.940000
380	00:00:14.979000
381	00:00:15.019000
382	00:00:15.058000
383	00:00:15.098000
384	00:00:15.137000
385	00:00:15.178000
386	00:00:15.217000
387	00:00:15.257000
388	00:00:15.296000
389	00:00:15.336000
390	00:00:15.375000
391	00:00:15.415000
392	00:00:15.454000
393	00:00:15.494000
394	00:00:15.533000
395	00:00:15.573000
396	00:00:15.612000
397	00:00:15.652000
398	00:00:15.691000
399	00:00:15.731000
400	00:00:15.770000
401	00:00:15.810000
402	00:00:15.849000
403	00:00:15.889000
404	00:00:15.928000
405	00:00:15.968000
406	00:00:16.007000
407	00:00:16.047000
408	00:00:16.086000
409	00:00:16.126000
410	00:00:16.165000
411	00:00:16.205000
412	00:00:16.244000
413	00:00:16.284000
414	00:00:16.324000
415	00:00:16.363000
416	00:00:16.403000
417	00:00:16.442000
418	00:00:16.482000
419	00:00:16.521000
420	00:00:16.561000
421	00:00:16.600000
422	00:00:16.640000
423	00:00:16.679000
424	00:00:16.719000
425	00:00:16.758000
426	00:00:16.798000
427	00:00:16.837000
428	00:00:16.877000
429	00:00:16.916000
430	00:00:16.956000
431	00:00:16.995000
432	00:00:17.035000
433	00:00:17.074000
434	00:00:17.114000
435	00:00:17.153000
436	00:00:17.193000
437	00:00:17.232000
438	00:00:17.272000
439	00:00:17.311000
440	00:00:17.351000
441	00:00:17.390000
442	00:00:17.430000
443	00:00:17.469000
444	00:00:17.509000
445	00:00:17.548000
446	00:00:17.588000
447	00:00:17.627000
448	00:00:17.667000
449	00:00:17.706000
450	00:00:17.746000
451	00:00:17.786000
452	00:00:17.825000
453	00:00:17.865000
454	00:00:17.904000
455	00:00:17.944000
456	00:00:17.983000
457	00:00:18.023000
458	00:00:18.062000
459	00:00:18.102000
460	00:00:18.141000
461	00:00:18.181000
462	00:00:18.220000
463	00:00:18.260000
464	00:00:18.299000
465	00:00:18.339000
466	00:00:18.378000
467	00:00:18.418000
468	00:00:18.457000
469	00:00:18.497000
470	00:00:18.537000
471	00:00:18.577000
472	00:00:18.616000
473	00:00:18.656000
474	00:00:18.695000
475	00:00:18.735000
476	00:00:18.774000
477	00:00:18.814000
478	00:00:18.853000
479	00:00:18.893000
480	00:00:18.932000
481	00:00:18.972000
482	00:00:19.011000
483	00:00:19.051000
484	00:00:19.090000
485	00:00:19.130000
486	00:00:19.169000
487	00:00:19.209000
488	00:00:19.248000
489	00:00:19.288000
490	00:00:19.328000
491	00:00:19.367000
492	00:00:19.407000
493	00:00:19.446000
494	00:00:19.486000
495	00:00:19.525000
496	00:00:19.565000
497	00:00:19.604000
498	00:00:19.644000
499	00:00:19.683000
500	00:00:19.723000
501	00:00:19.762000
502	00:00:19.802000
503	00:00:19.841000
504	00:00:19.881000
505	00:00:19.920000
506	00:00:19.960000
507	00:00:19.999000
508	00:00:20.039000
509	00:00:20.078000
510	00:00:20.118000
511	00:00:20.157000
512	00:00:20.197000
513	00:00:20.236000
514	00:00:20.276000
515	00:00:20.315000
516	00:00:20.355000
517	00:00:20.394000
518	00:00:20.434000
519	00:00:20.473000
520	00:00:20.513000
521	00:00:20.552000
522	00:00:20.592000
523	00:00:20.631000
524	00:00:20.671000
525	00:00:20.710000
526	00:00:20.750000
527	00:00:20.789000
528	00:00:20.829000
529	00:00:20.868000
530	00:00:20.908000
531	00:00:20.947000
532	00:00:20.987000
533	00:00:21.026000
534	00:00:21.066000
535	00:00:21.106000
536	00:00:21.145000
537	00:00:21.185000
538	00:00:21.224000
539	00:00:21.264000
540	00:00:21.303000
541	00:00:21.343000
542	00:00:21.382000
543	00:00:21.422000
544	00:00:21.461000
545	00:00:21.501000
546	00:00:21.540000
547	00:00:21.580000
548	00:00:21.619000
549	00:00:21.659000
550	00:00:21.698000
551	00:00:21.738000
552	00:00:21.777000
553	00:00:21.817000
554	00:00:21.857000
555	00:00:21.897000
556	00:00:21.936000
557	00:00:21.976000
558	00:00:22.015000
559	00:00:22.055000
560	00:00:22.094000
561	00:00:22.134000
562	00:00:22.173000
563	00:00:22.213000
564	00:00:22.252000
565	00:00:22.292000
566	00:00:22.331000
567	00:00:22.371000
568	00:00:22.410000
569	00:00:22.450000
570	00:00:22.489000
571	00:00:22.529000
572	00:00:22.568000
573	00:00:22.608000
574	00:00:22.648000
575	00:00:22.687000
576	00:00:22.727000
577	00:00:22.766000
578	00:00:22.806000
579	00:00:22.845000
580	00:00:22.885000
581	00:00:22.924000
582	00:00:22.964000
583	00:00:23.003000
584	00:00:23.043000
585	00:00:23.082000
586	00:00:23.122000
587	00:00:23.161000
588	00:00:23.201000
589	00:00:23.240000
590	00:00:23.280000
591	00:00:23.319000
592	00:00:23.359000
593	00:00:23.398000
594	00:00:23.438000
595	00:00:23.477000
596	00:00:23.517000
597	00:00:23.556000
598	00:00:23.596000
599	00:00:23.635000
600	00:00:23.675000
601	00:00:23.714000
602	00:00:23.754000
603	00:00:23.793000
604	00:00:23.833000
605	00:00:23.872000
606	00:00:23.912000
607	00:00:23.951000
608	00:00:23.991000
609	00:00:24.030000
610	00:00:24.070000
611	00:00:24.109000
612	00:00:24.149000
613	00:00:24.189000
614	00:00:24.228000
615	00:00:24.268000
616	00:00:24.307000
617	00:00:24.347000
618	00:00:24.386000
619	00:00:24.426000
620	00:00:24.465000
621	00:00:24.505000
622	00:00:24.544000
623	00:00:24.584000
624	00:00:24.623000
625	00:00:24.663000
626	00:00:24.702000
627	00:00:24.742000
628	00:00:24.781000
629	00:00:24.821000
630	00:00:24.860000
631	00:00:24.900000
632	00:00:24.939000
633	00:00:24.979000
634	00:00:25.018000
635	00:00:25.058000
636	00:00:25.097000
637	00:00:25.137000
638	00:00:25.177000
639	00:00:25.217000
640	00:00:25.256000
641	00:00:25.296000
642	00:00:25.335000
643	00:00:25.375000
644	00:00:25.414000
645	00:00:25.454000
646	00:00:25.493000
647	00:00:25.533000
648	00:00:25.572000
649	00:00:25.612000
650	00:00:25.651000
651	00:00:25.691000
652	00:00:25.730000

## Sheet: #4
frame	time	PC	TB	ant isth	mid isth	post isth
296	00:00:11.659000
297	00:00:11.700000
298	00:00:11.740000
299	00:00:11.779000
300	00:00:11.819000
301	00:00:11.858000
302	00:00:11.898000
303	00:00:11.937000
304	00:00:11.977000
305	00:00:12.016000
306	00:00:12.056000
307	00:00:12.095000
308	00:00:12.135000
309	00:00:12.174000
310	00:00:12.214000
311	00:00:12.253000
312	00:00:12.293000
313	00:00:12.332000
314	00:00:12.372000
315	00:00:12.411000
316	00:00:12.451000
317	00:00:12.490000
318	00:00:12.530000
319	00:00:12.569000
320	00:00:12.609000
321	00:00:12.648000
322	00:00:12.688000
323	00:00:12.727000
324	00:00:12.767000
325	00:00:12.806000
326	00:00:12.846000
327	00:00:12.885000
328	00:00:12.925000
329	00:00:12.964000
330	00:00:13.004000
331	00:00:13.043000
332	00:00:13.083000
333	00:00:13.122000
334	00:00:13.162000
335	00:00:13.201000
336	00:00:13.241000
337	00:00:13.281000
338	00:00:13.320000
339	00:00:13.360000
340	00:00:13.399000
341	00:00:13.439000
342	00:00:13.478000
343	00:00:13.518000
344	00:00:13.557000
345	00:00:13.597000
346	00:00:13.636000
347	00:00:13.676000
348	00:00:13.715000
349	00:00:13.755000
350	00:00:13.794000
351	00:00:13.834000
352	00:00:13.873000
353	00:00:13.913000
354	00:00:13.952000
355	00:00:13.992000
356	00:00:14.031000
357	00:00:14.071000
358	00:00:14.110000
359	00:00:14.150000
360	00:00:14.189000
361	00:00:14.229000
362	00:00:14.268000
363	00:00:14.308000
364	00:00:14.347000
365	00:00:14.387000
366	00:00:14.426000
367	00:00:14.466000
368	00:00:14.505000
369	00:00:14.545000
370	00:00:14.584000
371	00:00:14.624000
372	00:00:14.663000
373	00:00:14.703000
374	00:00:14.743000
375	00:00:14.782000
376	00:00:14.822000
377	00:00:14.861000
378	00:00:14.900000
379	00:00:14.940000
380	00:00:14.979000
381	00:00:15.020000
382	00:00:15.060000
383	00:00:15.099000
384	00:00:15.139000
385	00:00:15.178000
386	00:00:15.218000
387	00:00:15.257000
388	00:00:15.297000
389	00:00:15.336000
390	00:00:15.376000
391	00:00:15.415000
392	00:00:15.455000
393	00:00:15.494000
394	00:00:15.534000
395	00:00:15.573000
396	00:00:15.613000
397	00:00:15.652000
398	00:00:15.692000
399	00:00:15.731000
400	00:00:15.771000
401	00:00:15.810000
402	00:00:15.850000
403	00:00:15.889000
404	00:00:15.929000
405	00:00:15.968000
406	00:00:16.008000
407	00:00:16.047000
408	00:00:16.087000
409	00:00:16.126000
410	00:00:16.166000
411	00:00:16.205000
412	00:00:16.245000
413	00:00:16.284000
414	00:00:16.324000
415	00:00:16.363000
416	00:00:16.403000
417	00:00:16.442000
418	00:00:16.482000
419	00:00:16.521000
420	00:00:16.561000
421	00:00:16.601000
422	00:00:16.640000
423	00:00:16.680000
424	00:00:16.719000
425	00:00:16.759000
426	00:00:16.798000
427	00:00:16.838000
428	00:00:16.877000
429	00:00:16.917000
430	00:00:16.956000
431	00:00:16.996000
432	00:00:17.035000
433	00:00:17.075000
434	00:00:17.114000
435	00:00:17.154000
436	00:00:17.193000
437	00:00:17.233000
438	00:00:17.272000
439	00:00:17.312000
440	00:00:17.351000
441	00:00:17.391000
442	00:00:17.430000
443	00:00:17.470000
444	00:00:17.509000
445	00:00:17.549000
446	00:00:17.588000
447	00:00:17.628000
448	00:00:17.667000
449	00:00:17.707000
450	00:00:17.746000
451	00:00:17.786000
452	00:00:17.825000
453	00:00:17.865000
454	00:00:17.904000
455	00:00:17.944000
456	00:00:17.983000
457	00:00:18.023000
458	00:00:18.063000
459	00:00:18.102000
460	00:00:18.142000
461	00:00:18.181000
462	00:00:18.221000
463	00:00:18.260000
464	00:00:18.300000
465	00:00:18.340000
466	00:00:18.380000
467	00:00:18.419000
468	00:00:18.459000
469	00:00:18.498000
470	00:00:18.538000
471	00:00:18.577000
472	00:00:18.617000
473	00:00:18.656000
474	00:00:18.696000
475	00:00:18.735000
476	00:00:18.775000
477	00:00:18.814000
478	00:00:18.854000
479	00:00:18.893000
480	00:00:18.933000
481	00:00:18.972000
482	00:00:19.012000
483	00:00:19.051000
484	00:00:19.091000
485	00:00:19.130000
486	00:00:19.170000
487	00:00:19.209000
488	00:00:19.249000
489	00:00:19.288000
490	00:00:19.328000
491	00:00:19.367000
492	00:00:19.407000
493	00:00:19.446000
494	00:00:19.486000
495	00:00:19.525000
496	00:00:19.565000
497	00:00:19.605000
498	00:00:19.644000
499	00:00:19.683000
500	00:00:19.723000
501	00:00:19.763000
502	00:00:19.802000
503	00:00:19.841000
504	00:00:19.881000
505	00:00:19.921000
506	00:00:19.960000
507	00:00:20
508	00:00:20.039000
509	00:00:20.079000
510	00:00:20.118000
511	00:00:20.158000
512	00:00:20.197000
513	00:00:20.237000
514	00:00:20.276000
515	00:00:20.316000
516	00:00:20.355000
517	00:00:20.395000
518	00:00:20.434000
519	00:00:20.474000
520	00:00:20.513000
521	00:00:20.553000
522	00:00:20.592000
523	00:00:20.632000
524	00:00:20.671000
525	00:00:20.711000
526	00:00:20.750000
527	00:00:20.790000
528	00:00:20.829000
529	00:00:20.869000
530	00:00:20.908000
531	00:00:20.948000
532	00:00:20.987000
533	00:00:21.027000
534	00:00:21.066000
535	00:00:21.106000
536	00:00:21.145000
537	00:00:21.185000
538	00:00:21.224000
539	00:00:21.264000
540	00:00:21.303000
541	00:00:21.343000
542	00:00:21.383000
543	00:00:21.422000
544	00:00:21.462000
545	00:00:21.501000
546	00:00:21.541000
547	00:00:21.580000
548	00:00:21.620000
549	00:00:21.659000
550	00:00:21.700000
551	00:00:21.739000
552	00:00:21.779000
553	00:00:21.818000
554	00:00:21.858000
555	00:00:21.897000
556	00:00:21.937000
557	00:00:21.976000
558	00:00:22.016000
559	00:00:22.055000
560	00:00:22.095000
561	00:00:22.134000
562	00:00:22.174000
563	00:00:22.213000
564	00:00:22.253000
565	00:00:22.292000
566	00:00:22.332000
567	00:00:22.371000
568	00:00:22.411000
569	00:00:22.450000
570	00:00:22.490000
571	00:00:22.529000
572	00:00:22.569000
573	00:00:22.608000
574	00:00:22.648000
575	00:00:22.687000
576	00:00:22.727000
577	00:00:22.766000
578	00:00:22.806000
579	00:00:22.845000
580	00:00:22.885000
581	00:00:22.925000
582	00:00:22.964000
583	00:00:23.004000
584	00:00:23.043000
585	00:00:23.083000
586	00:00:23.122000
587	00:00:23.162000
588	00:00:23.201000
589	00:00:23.241000
590	00:00:23.280000
591	00:00:23.320000
592	00:00:23.359000
593	00:00:23.399000
594	00:00:23.438000
595	00:00:23.478000
596	00:00:23.517000
597	00:00:23.557000
598	00:00:23.596000
599	00:00:23.636000
600	00:00:23.675000
601	00:00:23.715000
602	00:00:23.754000
603	00:00:23.794000
604	00:00:23.833000
605	00:00:23.873000
606	00:00:23.912000
607	00:00:23.952000
608	00:00:23.991000
609	00:00:24.031000
610	00:00:24.070000
611	00:00:24.110000
612	00:00:24.149000
613	00:00:24.189000
614	00:00:24.228000
615	00:00:24.268000
616	00:00:24.307000
617	00:00:24.347000
618	00:00:24.386000
619	00:00:24.426000
620	00:00:24.466000
621	00:00:24.505000
622	00:00:24.545000
623	00:00:24.584000
624	00:00:24.623000
625	00:00:24.663000
626	00:00:24.702000
627	00:00:24.742000
628	00:00:24.782000
629	00:00:24.821000
630	00:00:24.861000
631	00:00:24.900000
632	00:00:24.940000
633	00:00:24.979000
634	00:00:25.020000
635	00:00:25.059000
636	00:00:25.099000
637	00:00:25.138000
638	00:00:25.178000
639	00:00:25.217000
640	00:00:25.257000
641	00:00:25.296000
642	00:00:25.336000
643	00:00:25.375000
644	00:00:25.415000
645	00:00:25.454000
646	00:00:25.494000
647	00:00:25.533000
648	00:00:25.573000
649	00:00:25.612000
650	00:00:25.652000
651	00:00:25.691000
652	00:00:25.731000
653	00:00:25.770000
654	00:00:25.810000
655	00:00:25.849000
656	00:00:25.889000
657	00:00:25.928000
658	00:00:25.968000
659	00:00:26.007000
660	00:00:26.047000
661	00:00:26.086000
662	00:00:26.126000
663	00:00:26.165000
664	00:00:26.205000
665	00:00:26.245000
666	00:00:26.284000
667	00:00:26.324000
668	00:00:26.363000
669	00:00:26.403000
670	00:00:26.442000
671	00:00:26.482000
672	00:00:26.521000
673	00:00:26.561000
674	00:00:26.600000
675	00:00:26.640000
676	00:00:26.679000
677	00:00:26.719000
678	00:00:26.758000
679	00:00:26.798000
680	00:00:26.837000
681	00:00:26.877000
682	00:00:26.916000
683	00:00:26.956000
684	00:00:26.995000
685	00:00:27.035000
686	00:00:27.074000
687	00:00:27.114000
688	00:00:27.153000
689	00:00:27.193000
690	00:00:27.232000
691	00:00:27.272000
692	00:00:27.311000
693	00:00:27.351000
694	00:00:27.390000
695	00:00:27.430000
696	00:00:27.469000
697	00:00:27.509000
698	00:00:27.548000
699	00:00:27.588000
700	00:00:27.627000
701	00:00:27.667000
702	00:00:27.706000
703	00:00:27.746000
704	00:00:27.786000
705	00:00:27.825000
706	00:00:27.865000
707	00:00:27.904000
708	00:00:27.944000
709	00:00:27.983000
710	00:00:28.023000
711	00:00:28.062000
712	00:00:28.102000
713	00:00:28.141000
714	00:00:28.181000
715	00:00:28.220000
716	00:00:28.260000
717	00:00:28.299000
718	00:00:28.339000
719	00:00:28.379000
720	00:00:28.419000
721	00:00:28.458000
722	00:00:28.498000
723	00:00:28.537000
724	00:00:28.577000
725	00:00:28.616000
726	00:00:28.656000
727	00:00:28.695000
728	00:00:28.735000
729	00:00:28.774000
730	00:00:28.814000
731	00:00:28.853000
732	00:00:28.893000
733	00:00:28.932000
734	00:00:28.972000
735	00:00:29.011000
736	00:00:29.051000
737	00:00:29.090000
738	00:00:29.130000
739	00:00:29.169000
740	00:00:29.209000
741	00:00:29.249000
742	00:00:29.288000
743	00:00:29.328000
744	00:00:29.367000
745	00:00:29.407000
746	00:00:29.446000
747	00:00:29.485000
748	00:00:29.525000
749	00:00:29.565000
750	00:00:29.604000
751	00:00:29.644000
752	00:00:29.683000
753	00:00:29.723000
754	00:00:29.762000
755	00:00:29.802000
756	00:00:29.841000
757	00:00:29.881000
758	00:00:29.920000
759	00:00:29.960000
760	00:00:29.999000
761	00:00:30.039000
762	00:00:30.078000
763	00:00:30.118000
764	00:00:30.157000
765	00:00:30.197000
766	00:00:30.236000
767	00:00:30.276000
768	00:00:30.315000
769	00:00:30.355000
770	00:00:30.394000
771	00:00:30.434000
772	00:00:30.473000
773	00:00:30.513000
774	00:00:30.552000
775	00:00:30.592000
776	00:00:30.631000
777	00:00:30.671000
778	00:00:30.710000
779	00:00:30.750000
780	00:00:30.789000
781	00:00:30.829000
782	00:00:30.868000
783	00:00:30.908000
784	00:00:30.947000
785	00:00:30.987000
786	00:00:31.026000
787	00:00:31.066000
788	00:00:31.106000
789	00:00:31.145000
790	00:00:31.185000
791	00:00:31.224000
792	00:00:31.264000
793	00:00:31.303000
794	00:00:31.343000
795	00:00:31.382000
796	00:00:31.422000
797	00:00:31.461000
798	00:00:31.501000
799	00:00:31.540000
800	00:00:31.580000
801	00:00:31.619000
802	00:00:31.659000
803	00:00:31.699000
804	00:00:31.739000
805	00:00:31.778000
806	00:00:31.818000
807	00:00:31.857000
808	00:00:31.897000
809	00:00:31.936000
810	00:00:31.976000
811	00:00:32.015000
812	00:00:32.055000
813	00:00:32.094000
814	00:00:32.134000
815	00:00:32.173000
816	00:00:32.213000
817	00:00:32.252000
818	00:00:32.292000
819	00:00:32.331000
820	00:00:32.371000
821	00:00:32.410000
822	00:00:32.450000
823	00:00:32.489000
824	00:00:32.529000
825	00:00:32.568000
826	00:00:32.608000
827	00:00:32.648000
828	00:00:32.687000
829	00:00:32.727000
830	00:00:32.766000
831	00:00:32.806000
832	00:00:32.845000
833	00:00:32.885000
834	00:00:32.924000
835	00:00:32.964000
836	00:00:33.003000
837	00:00:33.043000
838	00:00:33.082000
839	00:00:33.122000
840	00:00:33.161000
841	00:00:33.201000
842	00:00:33.240000
843	00:00:33.280000
844	00:00:33.319000
845	00:00:33.359000
846	00:00:33.398000
847	00:00:33.438000
848	00:00:33.477000
849	00:00:33.517000
850	00:00:33.556000
851	00:00:33.596000
852	00:00:33.635000
853	00:00:33.675000
854	00:00:33.714000
855	00:00:33.754000
856	00:00:33.793000
857	00:00:33.833000
858	00:00:33.872000
859	00:00:33.912000
860	00:00:33.951000
861	00:00:33.991000
862	00:00:34.030000
863	00:00:34.070000
864	00:00:34.110000
865	00:00:34.149000
866	00:00:34.189000
867	00:00:34.228000
868	00:00:34.267000
869	00:00:34.307000
870	00:00:34.347000
871	00:00:34.386000
872	00:00:34.426000
873	00:00:34.465000
874	00:00:34.505000
875	00:00:34.544000
876	00:00:34.584000
877	00:00:34.623000
878	00:00:34.663000
879	00:00:34.702000
880	00:00:34.742000
881	00:00:34.781000
882	00:00:34.821000
883	00:00:34.860000
884	00:00:34.900000
885	00:00:34.939000
886	00:00:34.979000
887	00:00:35.019000
888	00:00:35.059000
889	00:00:35.098000
890	00:00:35.138000
891	00:00:35.177000
892	00:00:35.217000
893	00:00:35.256000
894	00:00:35.296000
895	00:00:35.335000
896	00:00:35.375000
897	00:00:35.414000
898	00:00:35.454000
899	00:00:35.493000
900	00:00:35.533000
901	00:00:35.572000
902	00:00:35.612000
903	00:00:35.651000
904	00:00:35.691000
905	00:00:35.730000
906	00:00:35.770000
907	00:00:35.809000
908	00:00:35.849000
909	00:00:35.888000
910	00:00:35.928000
911	00:00:35.968000
912	00:00:36.007000
913	00:00:36.047000
914	00:00:36.086000
915	00:00:36.126000
916	00:00:36.165000
917	00:00:36.205000
918	00:00:36.244000
919	00:00:36.284000
920	00:00:36.323000
921	00:00:36.363000
922	00:00:36.402000
923	00:00:36.442000
924	00:00:36.481000
925	00:00:36.521000
926	00:00:36.560000
927	00:00:36.600000
928	00:00:36.639000
929	00:00:36.679000
930	00:00:36.718000
931	00:00:36.758000
932	00:00:36.797000
933	00:00:36.837000
934	00:00:36.876000
935	00:00:36.916000
936	00:00:36.955000
937	00:00:36.995000
938	00:00:37.034000
939	00:00:37.074000
940	00:00:37.113000
941	00:00:37.153000
942	00:00:37.192000
943	00:00:37.232000
944	00:00:37.271000
945	00:00:37.311000
946	00:00:37.350000
947	00:00:37.390000
948	00:00:37.430000
949	00:00:37.469000
950	00:00:37.509000
951	00:00:37.548000
952	00:00:37.588000
953	00:00:37.627000
954	00:00:37.667000
955	00:00:37.706000
956	00:00:37.746000
957	00:00:37.785000
958	00:00:37.825000
959	00:00:37.864000
960	00:00:37.904000
961	00:00:37.943000
962	00:00:37.983000
963	00:00:38.022000
964	00:00:38.062000
965	00:00:38.101000
966	00:00:38.141000
967	00:00:38.180000
968	00:00:38.220000
969	00:00:38.259000
970	00:00:38.299000

## Sheet: #6
frame	time	PC	TB	ant isth	mid isth	post isth
400	00:00:15.768000
401	00:00:15.808000
402	00:00:15.847000
403	00:00:15.887000
404	00:00:15.926000
405	00:00:15.966000
406	00:00:16.005000
407	00:00:16.045000
408	00:00:16.084000
409	00:00:16.124000
410	00:00:16.164000
411	00:00:16.203000
412	00:00:16.243000
413	00:00:16.282000
414	00:00:16.321000
415	00:00:16.361000
416	00:00:16.400000
417	00:00:16.440000
418	00:00:16.480000
419	00:00:16.519000
420	00:00:16.559000
421	00:00:16.598000
422	00:00:16.638000
423	00:00:16.677000
424	00:00:16.717000
425	00:00:16.756000
426	00:00:16.796000
427	00:00:16.835000
428	00:00:16.875000
429	00:00:16.914000
430	00:00:16.954000
431	00:00:16.993000
432	00:00:17.033000
433	00:00:17.072000
434	00:00:17.112000
435	00:00:17.151000
436	00:00:17.191000
437	00:00:17.230000
438	00:00:17.270000
439	00:00:17.309000
440	00:00:17.349000
441	00:00:17.388000
442	00:00:17.428000
443	00:00:17.467000
444	00:00:17.507000
445	00:00:17.546000
446	00:00:17.586000
447	00:00:17.625000
448	00:00:17.665000
449	00:00:17.704000
450	00:00:17.744000
451	00:00:17.784000
452	00:00:17.824000
453	00:00:17.863000
454	00:00:17.903000
455	00:00:17.942000
456	00:00:17.982000
457	00:00:18.022000
458	00:00:18.061000
459	00:00:18.101000
460	00:00:18.140000
461	00:00:18.180000
462	00:00:18.219000
463	00:00:18.259000
464	00:00:18.298000
465	00:00:18.338000
466	00:00:18.377000
467	00:00:18.417000
468	00:00:18.456000
469	00:00:18.496000
470	00:00:18.535000
471	00:00:18.575000
472	00:00:18.614000
473	00:00:18.654000
474	00:00:18.693000
475	00:00:18.733000
476	00:00:18.772000
477	00:00:18.812000
478	00:00:18.851000
479	00:00:18.891000
480	00:00:18.930000
481	00:00:18.970000
482	00:00:19.009000
483	00:00:19.049000
484	00:00:19.088000
485	00:00:19.128000
486	00:00:19.167000
487	00:00:19.207000
488	00:00:19.246000
489	00:00:19.286000
490	00:00:19.325000
491	00:00:19.365000
492	00:00:19.404000
493	00:00:19.444000
494	00:00:19.484000
495	00:00:19.523000
496	00:00:19.563000
497	00:00:19.602000
498	00:00:19.642000
499	00:00:19.681000
500	00:00:19.721000
501	00:00:19.760000
502	00:00:19.800000
503	00:00:19.839000
504	00:00:19.879000
505	00:00:19.918000
506	00:00:19.958000
507	00:00:19.997000
508	00:00:20.037000
509	00:00:20.076000
510	00:00:20.116000
511	00:00:20.155000
512	00:00:20.195000
513	00:00:20.234000
514	00:00:20.274000
515	00:00:20.313000
516	00:00:20.353000
517	00:00:20.392000
518	00:00:20.432000
519	00:00:20.471000
520	00:00:20.511000
521	00:00:20.550000
522	00:00:20.590000
523	00:00:20.629000
524	00:00:20.669000
525	00:00:20.708000
526	00:00:20.748000
527	00:00:20.787000
528	00:00:20.827000
529	00:00:20.866000
530	00:00:20.906000
531	00:00:20.945000
532	00:00:20.985000
533	00:00:21.025000
534	00:00:21.064000
535	00:00:21.104000
536	00:00:21.143000
537	00:00:21.182000
538	00:00:21.222000
539	00:00:21.261000
540	00:00:21.301000
541	00:00:21.341000
542	00:00:21.380000
543	00:00:21.420000
544	00:00:21.459000
545	00:00:21.499000
546	00:00:21.538000
547	00:00:21.578000
548	00:00:21.617000
549	00:00:21.657000
550	00:00:21.696000
551	00:00:21.736000
552	00:00:21.775000
553	00:00:21.815000
554	00:00:21.854000
555	00:00:21.894000
556	00:00:21.933000
557	00:00:21.973000
558	00:00:22.012000
559	00:00:22.052000
560	00:00:22.091000
561	00:00:22.131000
562	00:00:22.170000
563	00:00:22.210000
564	00:00:22.249000
565	00:00:22.289000
566	00:00:22.328000
567	00:00:22.368000
568	00:00:22.407000
569	00:00:22.447000
570	00:00:22.486000
571	00:00:22.526000
572	00:00:22.565000
573	00:00:22.605000
574	00:00:22.644000
575	00:00:22.684000
576	00:00:22.723000
577	00:00:22.763000
578	00:00:22.804000
579	00:00:22.843000
580	00:00:22.883000
581	00:00:22.922000
582	00:00:22.962000
583	00:00:23.001000
584	00:00:23.041000
585	00:00:23.080000
586	00:00:23.120000
587	00:00:23.159000
588	00:00:23.199000
589	00:00:23.238000
590	00:00:23.278000
591	00:00:23.317000
592	00:00:23.357000
593	00:00:23.396000
594	00:00:23.436000
595	00:00:23.475000
596	00:00:23.515000
597	00:00:23.554000
598	00:00:23.594000
599	00:00:23.633000
600	00:00:23.673000
601	00:00:23.712000
602	00:00:23.752000
603	00:00:23.791000
604	00:00:23.831000
605	00:00:23.870000
606	00:00:23.910000
607	00:00:23.949000
608	00:00:23.989000
609	00:00:24.028000
610	00:00:24.068000
611	00:00:24.107000
612	00:00:24.147000
613	00:00:24.186000
614	00:00:24.226000
615	00:00:24.265000
616	00:00:24.305000
617	00:00:24.345000
618	00:00:24.384000
619	00:00:24.424000
620	00:00:24.463000
621	00:00:24.503000
622	00:00:24.542000
623	00:00:24.582000
624	00:00:24.621000
625	00:00:24.661000
626	00:00:24.700000
627	00:00:24.740000
628	00:00:24.779000
629	00:00:24.819000
630	00:00:24.858000
631	00:00:24.898000
632	00:00:24.937000
633	00:00:24.977000
634	00:00:25.016000
635	00:00:25.056000
636	00:00:25.095000
637	00:00:25.135000
638	00:00:25.174000
639	00:00:25.214000
640	00:00:25.253000
641	00:00:25.293000
642	00:00:25.332000
643	00:00:25.372000
644	00:00:25.411000
645	00:00:25.451000
646	00:00:25.490000
647	00:00:25.530000
648	00:00:25.569000
649	00:00:25.609000
650	00:00:25.648000
651	00:00:25.688000
652	00:00:25.727000
653	00:00:25.767000
654	00:00:25.806000
655	00:00:25.846000
656	00:00:25.886000
657	00:00:25.925000
658	00:00:25.964000
659	00:00:26.004000
660	00:00:26.043000
661	00:00:26.083000
662	00:00:26.122000
663	00:00:26.162000
664	00:00:26.202000
665	00:00:26.241000
666	00:00:26.281000
667	00:00:26.320000
668	00:00:26.360000
669	00:00:26.399000
670	00:00:26.439000
671	00:00:26.478000
672	00:00:26.518000
673	00:00:26.557000
674	00:00:26.597000
675	00:00:26.636000
676	00:00:26.676000
677	00:00:26.715000
678	00:00:26.755000
679	00:00:26.794000
680	00:00:26.834000
681	00:00:26.873000
682	00:00:26.913000
683	00:00:26.952000
684	00:00:26.992000
685	00:00:27.031000
686	00:00:27.071000
687	00:00:27.110000
688	00:00:27.150000
689	00:00:27.189000
690	00:00:27.229000
691	00:00:27.268000
692	00:00:27.308000
693	00:00:27.347000
694	00:00:27.387000
695	00:00:27.426000
696	00:00:27.466000
697	00:00:27.505000
698	00:00:27.545000
699	00:00:27.584000
700	00:00:27.624000
701	00:00:27.664000
702	00:00:27.703000
703	00:00:27.743000
704	00:00:27.782000
705	00:00:27.823000
706	00:00:27.862000
707	00:00:27.902000
708	00:00:27.941000
709	00:00:27.981000
710	00:00:28.020000
711	00:00:28.060000
712	00:00:28.099000
713	00:00:28.139000
714	00:00:28.178000
715	00:00:28.218000
716	00:00:28.257000
717	00:00:28.297000
718	00:00:28.336000
719	00:00:28.376000
720	00:00:28.415000
721	00:00:28.455000
722	00:00:28.494000
723	00:00:28.534000
724	00:00:28.573000
725	00:00:28.613000
726	00:00:28.652000
727	00:00:28.692000
728	00:00:28.731000
729	00:00:28.771000
730	00:00:28.810000
731	00:00:28.850000
732	00:00:28.889000
733	00:00:28.929000
734	00:00:28.968000
735	00:00:29.008000
736	00:00:29.047000
737	00:00:29.087000
738	00:00:29.126000
739	00:00:29.166000
740	00:00:29.206000
741	00:00:29.245000
742	00:00:29.285000
743	00:00:29.324000
744	00:00:29.364000
745	00:00:29.403000
746	00:00:29.443000
747	00:00:29.482000
748	00:00:29.522000
749	00:00:29.561000
750	00:00:29.601000
751	00:00:29.640000
752	00:00:29.680000
753	00:00:29.719000
754	00:00:29.759000
755	00:00:29.798000
756	00:00:29.838000
757	00:00:29.877000
758	00:00:29.917000
759	00:00:29.956000
760	00:00:29.996000
761	00:00:30.035000
762	00:00:30.075000
763	00:00:30.114000
764	00:00:30.154000
765	00:00:30.193000
766	00:00:30.233000
767	00:00:30.272000
768	00:00:30.312000
769	00:00:30.351000
770	00:00:30.391000
771	00:00:30.430000
772	00:00:30.470000
773	00:00:30.509000
774	00:00:30.549000
775	00:00:30.588000
776	00:00:30.628000
777	00:00:30.668000
778	00:00:30.707000
779	00:00:30.747000
780	00:00:30.786000
781	00:00:30.825000
782	00:00:30.865000
783	00:00:30.904000
784	00:00:30.944000
785	00:00:30.984000
786	00:00:31.023000
787	00:00:31.063000
788	00:00:31.102000
789	00:00:31.142000
790	00:00:31.181000
791	00:00:31.221000
792	00:00:31.260000
793	00:00:31.300000
794	00:00:31.339000
795	00:00:31.379000
796	00:00:31.418000
797	00:00:31.458000
798	00:00:31.497000
799	00:00:31.537000
800	00:00:31.576000
801	00:00:31.616000
802	00:00:31.655000
803	00:00:31.695000
804	00:00:31.734000
805	00:00:31.774000
806	00:00:31.813000
807	00:00:31.853000
808	00:00:31.892000
809	00:00:31.932000
810	00:00:31.971000
811	00:00:32.011000
812	00:00:32.050000
813	00:00:32.090000
814	00:00:32.129000
815	00:00:32.169000
816	00:00:32.209000
817	00:00:32.248000
818	00:00:32.287000
819	00:00:32.327000
820	00:00:32.366000
821	00:00:32.406000
822	00:00:32.445000
823	00:00:32.485000
824	00:00:32.525000
825	00:00:32.564000
826	00:00:32.604000
827	00:00:32.643000
828	00:00:32.683000
829	00:00:32.722000
830	00:00:32.762000
831	00:00:32.802000
832	00:00:32.842000
833	00:00:32.881000
834	00:00:32.921000
835	00:00:32.960000
836	00:00:33
837	00:00:33.039000
838	00:00:33.079000
839	00:00:33.118000
840	00:00:33.158000
841	00:00:33.197000
842	00:00:33.237000
843	00:00:33.276000
844	00:00:33.316000
845	00:00:33.355000
846	00:00:33.395000
847	00:00:33.434000
848	00:00:33.474000
849	00:00:33.513000
850	00:00:33.553000
851	00:00:33.592000
852	00:00:33.632000
853	00:00:33.671000
854	00:00:33.711000
855	00:00:33.750000
856	00:00:33.790000
857	00:00:33.829000
858	00:00:33.869000
859	00:00:33.908000
860	00:00:33.948000
861	00:00:33.987000
862	00:00:34.027000
863	00:00:34.067000
864	00:00:34.106000
865	00:00:34.146000
866	00:00:34.185000
867	00:00:34.225000
868	00:00:34.264000
869	00:00:34.304000
870	00:00:34.343000
871	00:00:34.383000
872	00:00:34.422000
873	00:00:34.462000
874	00:00:34.501000
875	00:00:34.541000
876	00:00:34.580000
877	00:00:34.620000
878	00:00:34.659000
879	00:00:34.699000
880	00:00:34.738000
881	00:00:34.778000
882	00:00:34.817000
883	00:00:34.857000
884	00:00:34.896000
885	00:00:34.936000
886	00:00:34.975000
887	00:00:35.015000
888	00:00:35.054000
889	00:00:35.094000
890	00:00:35.133000
891	00:00:35.173000
892	00:00:35.212000
893	00:00:35.252000
894	00:00:35.291000
895	00:00:35.331000
896	00:00:35.370000
897	00:00:35.410000
898	00:00:35.449000
899	00:00:35.489000
900	00:00:35.529000
901	00:00:35.568000
902	00:00:35.607000
903	00:00:35.647000
904	00:00:35.686000
905	00:00:35.726000
906	00:00:35.765000
907	00:00:35.805000
908	00:00:35.845000
909	00:00:35.884000
910	00:00:35.924000
911	00:00:35.963000
912	00:00:36.003000
913	00:00:36.042000
914	00:00:36.082000
915	00:00:36.121000
916	00:00:36.161000
917	00:00:36.200000
918	00:00:36.240000
919	00:00:36.279000
920	00:00:36.319000
921	00:00:36.358000
922	00:00:36.398000
923	00:00:36.437000
924	00:00:36.477000
925	00:00:36.516000
926	00:00:36.556000
927	00:00:36.595000
928	00:00:36.635000
929	00:00:36.674000
930	00:00:36.714000
931	00:00:36.753000
932	00:00:36.793000
933	00:00:36.832000
934	00:00:36.872000
935	00:00:36.911000
936	00:00:36.951000
937	00:00:36.990000
938	00:00:37.030000

## Sheet: #7
frame	time	PC	TB	ant isth	mid isth	post isth
1	00:00:00
2	00:00:00.040000
3	00:00:00.079000
4	00:00:00.119000
5	00:00:00.158000
6	00:00:00.198000
7	00:00:00.237000
8	00:00:00.277000
9	00:00:00.316000
10	00:00:00.356000
11	00:00:00.395000
12	00:00:00.435000
13	00:00:00.474000
14	00:00:00.514000
15	00:00:00.553000
16	00:00:00.593000
17	00:00:00.632000
18	00:00:00.672000
19	00:00:00.711000
20	00:00:00.751000
21	00:00:00.790000
22	00:00:00.830000
23	00:00:00.869000
24	00:00:00.909000
25	00:00:00.948000
26	00:00:00.988000
27	00:00:01.027000
28	00:00:01.067000
29	00:00:01.106000
30	00:00:01.146000
31	00:00:01.185000
32	00:00:01.225000
33	00:00:01.264000
34	00:00:01.304000
35	00:00:01.343000
36	00:00:01.383000
37	00:00:01.422000
38	00:00:01.462000
39	00:00:01.502000
40	00:00:01.541000
41	00:00:01.581000
42	00:00:01.620000
43	00:00:01.660000
44	00:00:01.699000
45	00:00:01.739000
46	00:00:01.778000
47	00:00:01.818000
48	00:00:01.857000
49	00:00:01.897000
50	00:00:01.936000
51	00:00:01.976000
52	00:00:02.015000
53	00:00:02.055000
54	00:00:02.094000
55	00:00:02.134000
56	00:00:02.173000
57	00:00:02.213000
58	00:00:02.252000
59	00:00:02.292000
60	00:00:02.331000
61	00:00:02.371000
62	00:00:02.410000
63	00:00:02.450000
64	00:00:02.489000
65	00:00:02.530000
66	00:00:02.569000
67	00:00:02.609000
68	00:00:02.648000
69	00:00:02.688000
70	00:00:02.727000
71	00:00:02.767000
72	00:00:02.806000
73	00:00:02.846000
74	00:00:02.885000
75	00:00:02.925000
76	00:00:02.964000
77	00:00:03.004000
78	00:00:03.044000
79	00:00:03.083000
80	00:00:03.122000
81	00:00:03.162000
82	00:00:03.201000
83	00:00:03.241000
84	00:00:03.280000
85	00:00:03.320000
86	00:00:03.360000
87	00:00:03.399000
88	00:00:03.439000
89	00:00:03.478000
90	00:00:03.518000
91	00:00:03.557000
92	00:00:03.597000
93	00:00:03.636000
94	00:00:03.676000
95	00:00:03.715000
96	00:00:03.755000
97	00:00:03.794000
98	00:00:03.834000
99	00:00:03.873000
100	00:00:03.913000
101	00:00:03.952000
102	00:00:03.992000
103	00:00:04.031000
104	00:00:04.071000
105	00:00:04.110000
106	00:00:04.150000
107	00:00:04.189000
108	00:00:04.229000
109	00:00:04.268000
110	00:00:04.308000
111	00:00:04.347000
112	00:00:04.387000
113	00:00:04.426000
114	00:00:04.466000
115	00:00:04.505000
116	00:00:04.545000
117	00:00:04.584000
118	00:00:04.624000
119	00:00:04.663000
120	00:00:04.703000
121	00:00:04.742000
122	00:00:04.782000
123	00:00:04.822000
124	00:00:04.861000
125	00:00:04.901000
126	00:00:04.940000
127	00:00:04.980000
128	00:00:05.019000
129	00:00:05.059000
130	00:00:05.098000
131	00:00:05.138000
132	00:00:05.177000
133	00:00:05.217000
134	00:00:05.256000
135	00:00:05.296000
136	00:00:05.335000
137	00:00:05.375000
138	00:00:05.414000
139	00:00:05.454000
140	00:00:05.493000
141	00:00:05.533000
142	00:00:05.572000
143	00:00:05.612000
144	00:00:05.651000
145	00:00:05.691000
146	00:00:05.730000
147	00:00:05.770000
148	00:00:05.809000
149	00:00:05.849000
150	00:00:05.888000
151	00:00:05.928000
152	00:00:05.967000
153	00:00:06.007000
154	00:00:06.046000
155	00:00:06.086000
156	00:00:06.125000
157	00:00:06.165000
158	00:00:06.204000
159	00:00:06.244000
160	00:00:06.283000
161	00:00:06.323000
162	00:00:06.363000
163	00:00:06.402000
164	00:00:06.442000
165	00:00:06.481000
166	00:00:06.521000
167	00:00:06.560000
168	00:00:06.600000
169	00:00:06.639000
170	00:00:06.679000
171	00:00:06.718000
172	00:00:06.758000
173	00:00:06.797000
174	00:00:06.837000
175	00:00:06.876000
176	00:00:06.916000
177	00:00:06.955000
178	00:00:06.995000
179	00:00:07.034000
180	00:00:07.074000
181	00:00:07.113000
182	00:00:07.153000
183	00:00:07.192000
184	00:00:07.232000
185	00:00:07.271000
186	00:00:07.311000
187	00:00:07.350000
188	00:00:07.390000
189	00:00:07.429000
190	00:00:07.469000
191	00:00:07.509000
192	00:00:07.549000
193	00:00:07.588000
194	00:00:07.628000
195	00:00:07.667000
196	00:00:07.707000
197	00:00:07.746000
198	00:00:07.786000
199	00:00:07.825000
200	00:00:07.865000
201	00:00:07.904000
202	00:00:07.944000
203	00:00:07.984000
204	00:00:08.023000
205	00:00:08.062000
206	00:00:08.102000
207	00:00:08.141000
208	00:00:08.181000
209	00:00:08.221000
210	00:00:08.260000
211	00:00:08.300000
212	00:00:08.339000
213	00:00:08.379000
214	00:00:08.418000
215	00:00:08.458000
216	00:00:08.497000
217	00:00:08.537000
218	00:00:08.576000
219	00:00:08.616000
220	00:00:08.655000
221	00:00:08.695000
222	00:00:08.734000
223	00:00:08.774000
224	00:00:08.813000
225	00:00:08.853000
226	00:00:08.892000
227	00:00:08.932000
228	00:00:08.971000
229	00:00:09.011000
230	00:00:09.050000
231	00:00:09.090000
232	00:00:09.129000
233	00:00:09.169000
234	00:00:09.208000
235	00:00:09.248000
236	00:00:09.287000
237	00:00:09.327000
238	00:00:09.366000
239	00:00:09.406000
240	00:00:09.445000
241	00:00:09.485000
242	00:00:09.524000
243	00:00:09.564000
244	00:00:09.603000
245	00:00:09.643000
246	00:00:09.683000
247	00:00:09.722000
248	00:00:09.762000
249	00:00:09.801000
250	00:00:09.841000
251	00:00:09.880000
252	00:00:09.920000
253	00:00:09.959000
254	00:00:09.999000
255	00:00:10.038000
256	00:00:10.078000
257	00:00:10.117000
258	00:00:10.157000
259	00:00:10.196000
260	00:00:10.236000
261	00:00:10.275000
262	00:00:10.315000
263	00:00:10.354000
264	00:00:10.394000
265	00:00:10.433000
266	00:00:10.473000
267	00:00:10.512000
268	00:00:10.552000
269	00:00:10.591000
270	00:00:10.631000
271	00:00:10.670000
272	00:00:10.710000
273	00:00:10.749000
274	00:00:10.789000
275	00:00:10.828000
276	00:00:10.868000
277	00:00:10.907000
278	00:00:10.947000
279	00:00:10.986000
280	00:00:11.026000
281	00:00:11.065000
282	00:00:11.105000
283	00:00:11.144000
284	00:00:11.184000
285	00:00:11.224000
286	00:00:11.263000
287	00:00:11.303000
288	00:00:11.342000
289	00:00:11.382000
290	00:00:11.421000
291	00:00:11.461000
292	00:00:11.500000
293	00:00:11.540000
294	00:00:11.579000
295	00:00:11.619000
296	00:00:11.658000
297	00:00:11.698000
298	00:00:11.737000
299	00:00:11.777000
300	00:00:11.816000
301	00:00:11.856000
302	00:00:11.895000
303	00:00:11.935000
304	00:00:11.974000
305	00:00:12.014000
306	00:00:12.053000
307	00:00:12.093000
308	00:00:12.132000
309	00:00:12.172000
310	00:00:12.211000
311	00:00:12.251000
312	00:00:12.290000
313	00:00:12.330000
314	00:00:12.369000
315	00:00:12.409000
316	00:00:12.448000
317	00:00:12.488000
318	00:00:12.528000
319	00:00:12.568000
320	00:00:12.607000
321	00:00:12.647000
322	00:00:12.687000
323	00:00:12.726000
324	00:00:12.765000
325	00:00:12.805000
326	00:00:12.844000
327	00:00:12.884000
328	00:00:12.923000
329	00:00:12.963000
330	00:00:13.003000
331	00:00:13.042000
332	00:00:13.082000
333	00:00:13.121000
334	00:00:13.161000
335	00:00:13.200000
336	00:00:13.240000
337	00:00:13.279000
338	00:00:13.319000
339	00:00:13.358000
340	00:00:13.398000
341	00:00:13.437000
342	00:00:13.477000
343	00:00:13.516000
344	00:00:13.556000
345	00:00:13.595000
346	00:00:13.635000
347	00:00:13.674000
348	00:00:13.714000
349	00:00:13.753000
350	00:00:13.793000
351	00:00:13.832000
352	00:00:13.872000
353	00:00:13.911000
354	00:00:13.951000
355	00:00:13.990000
356	00:00:14.030000
357	00:00:14.069000
358	00:00:14.109000
359	00:00:14.148000
360	00:00:14.188000
361	00:00:14.227000
362	00:00:14.267000
363	00:00:14.306000
364	00:00:14.346000
365	00:00:14.385000
366	00:00:14.425000
367	00:00:14.464000
368	00:00:14.504000
369	00:00:14.544000
370	00:00:14.583000
371	00:00:14.623000
372	00:00:14.662000
373	00:00:14.702000
374	00:00:14.741000
375	00:00:14.781000
376	00:00:14.820000
377	00:00:14.860000
378	00:00:14.899000
379	00:00:14.939000
380	00:00:14.978000
381	00:00:15.018000
382	00:00:15.057000
383	00:00:15.097000
384	00:00:15.136000
385	00:00:15.176000
386	00:00:15.215000
387	00:00:15.255000
388	00:00:15.294000
389	00:00:15.334000
390	00:00:15.373000
391	00:00:15.413000
392	00:00:15.452000
393	00:00:15.492000
394	00:00:15.531000
395	00:00:15.571000
396	00:00:15.610000
397	00:00:15.650000
398	00:00:15.689000
399	00:00:15.729000
400	00:00:15.768000
401	00:00:15.808000
402	00:00:15.847000
403	00:00:15.887000
404	00:00:15.926000
405	00:00:15.966000
406	00:00:16.005000
407	00:00:16.045000
408	00:00:16.085000
409	00:00:16.124000
410	00:00:16.164000
411	00:00:16.203000
412	00:00:16.243000
413	00:00:16.282000
414	00:00:16.322000
415	00:00:16.361000
416	00:00:16.401000
417	00:00:16.440000
418	00:00:16.480000
419	00:00:16.519000
420	00:00:16.559000
421	00:00:16.598000
422	00:00:16.638000
423	00:00:16.677000
424	00:00:16.717000
425	00:00:16.756000
426	00:00:16.796000
427	00:00:16.835000
428	00:00:16.875000
429	00:00:16.914000
430	00:00:16.954000
431	00:00:16.993000
432	00:00:17.033000
433	00:00:17.072000
434	00:00:17.112000
435	00:00:17.151000
436	00:00:17.191000
437	00:00:17.230000
438	00:00:17.270000
439	00:00:17.309000
440	00:00:17.349000
441	00:00:17.388000
442	00:00:17.428000
443	00:00:17.467000
444	00:00:17.508000
445	00:00:17.548000
446	00:00:17.587000
447	00:00:17.627000
448	00:00:17.666000
449	00:00:17.705000
450	00:00:17.745000
451	00:00:17.784000
452	00:00:17.824000
453	00:00:17.864000
454	00:00:17.903000
455	00:00:17.943000
456	00:00:17.982000
457	00:00:18.022000
458	00:00:18.061000
459	00:00:18.101000
460	00:00:18.140000
461	00:00:18.180000
462	00:00:18.219000
463	00:00:18.259000
464	00:00:18.298000
465	00:00:18.338000
466	00:00:18.377000
467	00:00:18.417000
468	00:00:18.456000
469	00:00:18.496000
470	00:00:18.535000
471	00:00:18.575000
472	00:00:18.614000
473	00:00:18.654000
474	00:00:18.693000
475	00:00:18.733000
476	00:00:18.772000
477	00:00:18.812000
478	00:00:18.851000
479	00:00:18.891000
480	00:00:18.930000
481	00:00:18.970000
482	00:00:19.009000
483	00:00:19.049000
484	00:00:19.088000
485	00:00:19.128000
486	00:00:19.167000
487	00:00:19.207000
488	00:00:19.246000
489	00:00:19.286000
490	00:00:19.325000
491	00:00:19.365000
492	00:00:19.405000
493	00:00:19.444000
494	00:00:19.484000
495	00:00:19.523000
496	00:00:19.563000
497	00:00:19.602000
498	00:00:19.642000
499	00:00:19.681000
500	00:00:19.721000
501	00:00:19.760000
502	00:00:19.800000
503	00:00:19.839000
504	00:00:19.879000
505	00:00:19.918000
506	00:00:19.958000
507	00:00:19.997000
508	00:00:20.037000
509	00:00:20.076000
510	00:00:20.116000
511	00:00:20.155000
512	00:00:20.195000
513	00:00:20.234000
514	00:00:20.274000
515	00:00:20.313000
516	00:00:20.353000
517	00:00:20.392000
518	00:00:20.432000
519	00:00:20.471000
520	00:00:20.511000
521	00:00:20.550000
522	00:00:20.590000
523	00:00:20.629000
524	00:00:20.669000
525	00:00:20.708000
526	00:00:20.748000
527	00:00:20.787000
528	00:00:20.827000
529	00:00:20.867000
530	00:00:20.906000
531	00:00:20.946000
532	00:00:20.985000
533	00:00:21.025000
534	00:00:21.064000
535	00:00:21.104000
536	00:00:21.143000
537	00:00:21.183000
538	00:00:21.222000
539	00:00:21.262000
540	00:00:21.301000
541	00:00:21.341000
542	00:00:21.380000
543	00:00:21.420000
544	00:00:21.459000
545	00:00:21.499000
546	00:00:21.538000
547	00:00:21.578000
548	00:00:21.617000
549	00:00:21.657000
550	00:00:21.696000
551	00:00:21.736000
552	00:00:21.775000
553	00:00:21.815000
554	00:00:21.854000

## Sheet: #8
frame	time	PC	TB	ant isth	mid isth	post isth
1	00:00:00
2	00:00:00.039000
3	00:00:00.079000
4	00:00:00.118000
5	00:00:00.158000
6	00:00:00.197000
7	00:00:00.236000
8	00:00:00.276000
9	00:00:00.316000
10	00:00:00.355000
11	00:00:00.395000
12	00:00:00.434000
13	00:00:00.474000
14	00:00:00.513000
15	00:00:00.553000
16	00:00:00.592000
17	00:00:00.632000
18	00:00:00.671000
19	00:00:00.711000
20	00:00:00.750000
21	00:00:00.790000
22	00:00:00.829000
23	00:00:00.869000
24	00:00:00.908000
25	00:00:00.948000
26	00:00:00.987000
27	00:00:01.027000
28	00:00:01.066000
29	00:00:01.106000
30	00:00:01.145000
31	00:00:01.185000
32	00:00:01.224000
33	00:00:01.264000
34	00:00:01.303000
35	00:00:01.343000
36	00:00:01.382000
37	00:00:01.422000
38	00:00:01.461000
39	00:00:01.501000
40	00:00:01.540000
41	00:00:01.580000
42	00:00:01.619000
43	00:00:01.659000
44	00:00:01.698000
45	00:00:01.738000
46	00:00:01.777000
47	00:00:01.817000
48	00:00:01.857000
49	00:00:01.896000
50	00:00:01.936000
51	00:00:01.975000
52	00:00:02.015000
53	00:00:02.054000
54	00:00:02.094000
55	00:00:02.133000
56	00:00:02.173000
57	00:00:02.212000
58	00:00:02.252000
59	00:00:02.291000
60	00:00:02.331000
61	00:00:02.370000
62	00:00:02.410000
63	00:00:02.449000
64	00:00:02.489000
65	00:00:02.528000
66	00:00:02.568000
67	00:00:02.607000
68	00:00:02.647000
69	00:00:02.686000
70	00:00:02.726000
71	00:00:02.765000
72	00:00:02.805000
73	00:00:02.844000
74	00:00:02.884000
75	00:00:02.923000
76	00:00:02.963000
77	00:00:03.002000
78	00:00:03.042000
79	00:00:03.081000
80	00:00:03.121000
81	00:00:03.160000
82	00:00:03.200000
83	00:00:03.239000
84	00:00:03.279000
85	00:00:03.319000
86	00:00:03.358000
87	00:00:03.398000
88	00:00:03.437000
89	00:00:03.477000
90	00:00:03.516000
91	00:00:03.556000
92	00:00:03.595000
93	00:00:03.635000
94	00:00:03.674000
95	00:00:03.714000
96	00:00:03.753000
97	00:00:03.793000
98	00:00:03.832000
99	00:00:03.872000
100	00:00:03.911000
101	00:00:03.951000
102	00:00:03.990000
103	00:00:04.030000
104	00:00:04.069000
105	00:00:04.109000
106	00:00:04.148000
107	00:00:04.188000
108	00:00:04.227000
109	00:00:04.267000
110	00:00:04.306000
111	00:00:04.346000
112	00:00:04.385000
113	00:00:04.425000
114	00:00:04.464000
115	00:00:04.504000
116	00:00:04.543000
117	00:00:04.583000
118	00:00:04.622000
119	00:00:04.662000
120	00:00:04.701000
121	00:00:04.741000
122	00:00:04.780000
123	00:00:04.820000
124	00:00:04.860000
125	00:00:04.899000
126	00:00:04.939000
127	00:00:04.978000
128	00:00:05.019000
129	00:00:05.058000
130	00:00:05.097000
131	00:00:05.137000
132	00:00:05.177000
133	00:00:05.216000
134	00:00:05.256000
135	00:00:05.295000
136	00:00:05.335000
137	00:00:05.374000
138	00:00:05.414000
139	00:00:05.453000
140	00:00:05.493000
141	00:00:05.532000
142	00:00:05.572000
143	00:00:05.611000
144	00:00:05.651000
145	00:00:05.690000
146	00:00:05.730000
147	00:00:05.769000
148	00:00:05.809000
149	00:00:05.848000
150	00:00:05.888000
151	00:00:05.927000
152	00:00:05.967000
153	00:00:06.006000
154	00:00:06.046000
155	00:00:06.085000
156	00:00:06.125000
157	00:00:06.164000
158	00:00:06.204000
159	00:00:06.243000
160	00:00:06.283000
161	00:00:06.322000
162	00:00:06.362000
163	00:00:06.401000
164	00:00:06.441000
165	00:00:06.480000
166	00:00:06.520000
167	00:00:06.559000
168	00:00:06.599000
169	00:00:06.638000
170	00:00:06.678000
171	00:00:06.718000
172	00:00:06.757000
173	00:00:06.797000
174	00:00:06.836000
175	00:00:06.876000
176	00:00:06.915000
177	00:00:06.955000
178	00:00:06.994000
179	00:00:07.034000
180	00:00:07.073000
181	00:00:07.113000
182	00:00:07.152000
183	00:00:07.192000
184	00:00:07.231000
185	00:00:07.271000
186	00:00:07.310000
187	00:00:07.350000
188	00:00:07.389000
189	00:00:07.429000
190	00:00:07.468000
191	00:00:07.508000
192	00:00:07.547000
193	00:00:07.587000
194	00:00:07.626000
195	00:00:07.666000
196	00:00:07.705000
197	00:00:07.745000
198	00:00:07.784000
199	00:00:07.824000
200	00:00:07.863000
201	00:00:07.903000
202	00:00:07.942000
203	00:00:07.982000
204	00:00:08.021000
205	00:00:08.061000
206	00:00:08.100000
207	00:00:08.140000
208	00:00:08.180000
209	00:00:08.219000
210	00:00:08.259000
211	00:00:08.298000
212	00:00:08.338000
213	00:00:08.377000
214	00:00:08.417000
215	00:00:08.456000
216	00:00:08.496000
217	00:00:08.535000
218	00:00:08.575000
219	00:00:08.614000
220	00:00:08.654000
221	00:00:08.693000
222	00:00:08.733000
223	00:00:08.772000
224	00:00:08.812000
225	00:00:08.851000
226	00:00:08.891000
227	00:00:08.930000
228	00:00:08.970000
229	00:00:09.009000
230	00:00:09.049000
231	00:00:09.088000
232	00:00:09.128000
233	00:00:09.167000
234	00:00:09.207000
235	00:00:09.246000
236	00:00:09.286000
237	00:00:09.325000
238	00:00:09.365000
239	00:00:09.404000
240	00:00:09.444000
241	00:00:09.483000
242	00:00:09.523000
243	00:00:09.562000
244	00:00:09.602000
245	00:00:09.641000
246	00:00:09.681000
247	00:00:09.721000
248	00:00:09.760000
249	00:00:09.800000
250	00:00:09.839000
251	00:00:09.879000
252	00:00:09.918000
253	00:00:09.957000
254	00:00:09.997000
255	00:00:10.037000
256	00:00:10.076000
257	00:00:10.116000
258	00:00:10.155000
259	00:00:10.195000
260	00:00:10.234000
261	00:00:10.274000
262	00:00:10.313000
263	00:00:10.353000
264	00:00:10.392000
265	00:00:10.432000
266	00:00:10.471000
267	00:00:10.511000
268	00:00:10.550000
269	00:00:10.590000
270	00:00:10.629000
271	00:00:10.669000
272	00:00:10.708000
273	00:00:10.748000
274	00:00:10.787000
275	00:00:10.827000
276	00:00:10.866000
277	00:00:10.906000
278	00:00:10.945000
279	00:00:10.985000
280	00:00:11.024000
281	00:00:11.064000
282	00:00:11.103000
283	00:00:11.143000
284	00:00:11.182000
285	00:00:11.222000
286	00:00:11.261000
287	00:00:11.301000
288	00:00:11.340000
289	00:00:11.380000
290	00:00:11.419000
291	00:00:11.459000
292	00:00:11.499000
293	00:00:11.538000
294	00:00:11.578000
295	00:00:11.617000
296	00:00:11.657000
297	00:00:11.696000
298	00:00:11.736000
299	00:00:11.775000
300	00:00:11.815000
301	00:00:11.854000
302	00:00:11.894000
303	00:00:11.933000
304	00:00:11.973000
305	00:00:12.012000
306	00:00:12.052000
307	00:00:12.091000
308	00:00:12.131000
309	00:00:12.170000
310	00:00:12.210000
311	00:00:12.249000
312	00:00:12.289000
313	00:00:12.328000
314	00:00:12.368000
315	00:00:12.407000
316	00:00:12.447000
317	00:00:12.486000
318	00:00:12.526000
319	00:00:12.565000
320	00:00:12.605000
321	00:00:12.644000
322	00:00:12.684000
323	00:00:12.723000
324	00:00:12.763000
325	00:00:12.802000
326	00:00:12.842000
327	00:00:12.881000
328	00:00:12.921000
329	00:00:12.960000
330	00:00:13
331	00:00:13.040000
332	00:00:13.079000
333	00:00:13.119000
334	00:00:13.158000
335	00:00:13.198000
336	00:00:13.237000
337	00:00:13.277000
338	00:00:13.316000
339	00:00:13.356000
340	00:00:13.395000
341	00:00:13.435000
342	00:00:13.474000
343	00:00:13.514000
344	00:00:13.553000
345	00:00:13.593000
346	00:00:13.632000
347	00:00:13.672000
348	00:00:13.711000
349	00:00:13.751000
350	00:00:13.790000
351	00:00:13.830000
352	00:00:13.869000
353	00:00:13.909000
354	00:00:13.948000
355	00:00:13.988000
356	00:00:14.027000
357	00:00:14.067000
358	00:00:14.106000
359	00:00:14.146000
360	00:00:14.185000
361	00:00:14.225000
362	00:00:14.264000
363	00:00:14.304000
364	00:00:14.343000
365	00:00:14.383000
366	00:00:14.422000
367	00:00:14.462000
368	00:00:14.501000
369	00:00:14.541000
370	00:00:14.581000
371	00:00:14.620000
372	00:00:14.660000
373	00:00:14.699000
374	00:00:14.738000
375	00:00:14.778000
376	00:00:14.818000
377	00:00:14.857000
378	00:00:14.897000
379	00:00:14.936000
380	00:00:14.976000
381	00:00:15.016000
382	00:00:15.056000
383	00:00:15.095000
384	00:00:15.135000
385	00:00:15.174000
386	00:00:15.214000
387	00:00:15.253000
388	00:00:15.293000
389	00:00:15.332000
390	00:00:15.372000
391	00:00:15.411000
392	00:00:15.451000
393	00:00:15.490000
394	00:00:15.530000
395	00:00:15.569000
396	00:00:15.609000
397	00:00:15.648000
398	00:00:15.688000
399	00:00:15.727000
400	00:00:15.767000
401	00:00:15.806000
402	00:00:15.846000
403	00:00:15.885000
404	00:00:15.925000
405	00:00:15.964000
406	00:00:16.004000
407	00:00:16.044000
408	00:00:16.083000
409	00:00:16.122000
410	00:00:16.162000
411	00:00:16.201000
412	00:00:16.241000
413	00:00:16.280000
414	00:00:16.320000
415	00:00:16.360000
416	00:00:16.399000
417	00:00:16.439000
418	00:00:16.478000
419	00:00:16.518000
420	00:00:16.557000
421	00:00:16.597000
422	00:00:16.636000
423	00:00:16.676000
424	00:00:16.715000
425	00:00:16.755000
426	00:00:16.794000
427	00:00:16.834000
428	00:00:16.873000
429	00:00:16.913000
430	00:00:16.952000
431	00:00:16.992000
432	00:00:17.031000
433	00:00:17.071000
434	00:00:17.110000
435	00:00:17.150000
436	00:00:17.189000
437	00:00:17.229000
438	00:00:17.268000
439	00:00:17.308000
440	00:00:17.347000
441	00:00:17.387000
442	00:00:17.426000
443	00:00:17.466000
444	00:00:17.505000
445	00:00:17.545000
446	00:00:17.584000
447	00:00:17.624000
448	00:00:17.663000
449	00:00:17.703000
450	00:00:17.742000
451	00:00:17.782000
452	00:00:17.821000
453	00:00:17.861000
454	00:00:17.901000
455	00:00:17.940000
456	00:00:17.980000
457	00:00:18.019000
458	00:00:18.059000
459	00:00:18.098000
460	00:00:18.138000
461	00:00:18.177000
462	00:00:18.217000
463	00:00:18.256000
464	00:00:18.296000
465	00:00:18.335000
466	00:00:18.375000
467	00:00:18.414000
468	00:00:18.454000
469	00:00:18.493000
470	00:00:18.533000
471	00:00:18.572000
472	00:00:18.612000
473	00:00:18.651000
474	00:00:18.691000
475	00:00:18.730000
476	00:00:18.770000
477	00:00:18.809000
478	00:00:18.849000
479	00:00:18.888000
480	00:00:18.928000
481	00:00:18.967000
482	00:00:19.007000
483	00:00:19.046000
484	00:00:19.086000
485	00:00:19.125000
486	00:00:19.165000
487	00:00:19.204000
488	00:00:19.244000
489	00:00:19.283000
490	00:00:19.323000
491	00:00:19.363000
492	00:00:19.402000
493	00:00:19.442000
494	00:00:19.481000
495	00:00:19.521000
496	00:00:19.560000
497	00:00:19.600000
498	00:00:19.639000
499	00:00:19.679000
500	00:00:19.718000
501	00:00:19.758000
502	00:00:19.797000
503	00:00:19.837000
504	00:00:19.876000
505	00:00:19.916000
506	00:00:19.955000
507	00:00:19.995000
508	00:00:20.034000
509	00:00:20.074000
510	00:00:20.113000
511	00:00:20.153000
512	00:00:20.192000
513	00:00:20.232000
514	00:00:20.271000
515	00:00:20.311000
516	00:00:20.350000
517	00:00:20.390000
518	00:00:20.429000
519	00:00:20.469000
520	00:00:20.508000
521	00:00:20.548000
522	00:00:20.587000
523	00:00:20.627000
524	00:00:20.666000
525	00:00:20.706000
526	00:00:20.745000
527	00:00:20.785000
528	00:00:20.824000
529	00:00:20.864000
530	00:00:20.903000
531	00:00:20.943000
532	00:00:20.982000
533	00:00:21.022000
534	00:00:21.061000
535	00:00:21.101000
536	00:00:21.140000
537	00:00:21.180000
538	00:00:21.220000
539	00:00:21.259000
540	00:00:21.299000
541	00:00:21.338000
542	00:00:21.378000
543	00:00:21.417000
544	00:00:21.457000
545	00:00:21.496000
546	00:00:21.536000
547	00:00:21.575000
548	00:00:21.615000
549	00:00:21.654000
550	00:00:21.694000
551	00:00:21.733000
552	00:00:21.773000
553	00:00:21.812000
554	00:00:21.852000
555	00:00:21.891000
556	00:00:21.931000
557	00:00:21.970000
558	00:00:22.010000
559	00:00:22.049000
560	00:00:22.089000
561	00:00:22.128000
562	00:00:22.168000
563	00:00:22.207000
564	00:00:22.247000
565	00:00:22.286000
566	00:00:22.326000
567	00:00:22.365000
568	00:00:22.405000
569	00:00:22.444000
570	00:00:22.484000
571	00:00:22.523000
572	00:00:22.563000
573	00:00:22.602000
574	00:00:22.642000
575	00:00:22.682000
576	00:00:22.721000
577	00:00:22.761000
578	00:00:22.800000
579	00:00:22.840000
580	00:00:22.879000
581	00:00:22.919000
582	00:00:22.958000
583	00:00:22.998000
584	00:00:23.037000
585	00:00:23.077000
586	00:00:23.116000
587	00:00:23.156000
588	00:00:23.195000
589	00:00:23.235000
590	00:00:23.274000
591	00:00:23.314000
592	00:00:23.353000
593	00:00:23.393000

## Sheet: #9
frame	time	PC	TB	ant isth	mid isth	post isth
100	00:00:03.912000
101	00:00:03.951000
102	00:00:03.991000
103	00:00:04.030000
104	00:00:04.070000
105	00:00:04.109000
106	00:00:04.149000
107	00:00:04.188000
108	00:00:04.228000
109	00:00:04.267000
110	00:00:04.307000
111	00:00:04.346000
112	00:00:04.386000
113	00:00:04.425000
114	00:00:04.465000
115	00:00:04.504000
116	00:00:04.544000
117	00:00:04.583000
118	00:00:04.623000
119	00:00:04.662000
120	00:00:04.702000
121	00:00:04.741000
122	00:00:04.781000
123	00:00:04.820000
124	00:00:04.860000
125	00:00:04.899000
126	00:00:04.939000
127	00:00:04.979000
128	00:00:05.019000
129	00:00:05.059000
130	00:00:05.098000
131	00:00:05.138000
132	00:00:05.177000
133	00:00:05.217000
134	00:00:05.256000
135	00:00:05.296000
136	00:00:05.335000
137	00:00:05.375000
138	00:00:05.414000
139	00:00:05.454000
140	00:00:05.493000
141	00:00:05.533000
142	00:00:05.572000
143	00:00:05.612000
144	00:00:05.651000
145	00:00:05.691000
146	00:00:05.730000
147	00:00:05.770000
148	00:00:05.809000
149	00:00:05.849000
150	00:00:05.888000
151	00:00:05.928000
152	00:00:05.967000
153	00:00:06.007000
154	00:00:06.046000
155	00:00:06.086000
156	00:00:06.125000
157	00:00:06.165000
158	00:00:06.204000
159	00:00:06.244000
160	00:00:06.283000
161	00:00:06.323000
162	00:00:06.362000
163	00:00:06.402000
164	00:00:06.442000
165	00:00:06.481000
166	00:00:06.521000
167	00:00:06.560000
168	00:00:06.600000
169	00:00:06.639000
170	00:00:06.679000
171	00:00:06.718000
172	00:00:06.758000
173	00:00:06.797000
174	00:00:06.837000
175	00:00:06.876000
176	00:00:06.916000
177	00:00:06.955000
178	00:00:06.995000
179	00:00:07.034000
180	00:00:07.074000
181	00:00:07.113000
182	00:00:07.153000
183	00:00:07.192000
184	00:00:07.232000
185	00:00:07.271000
186	00:00:07.311000
187	00:00:07.350000
188	00:00:07.390000
189	00:00:07.429000
190	00:00:07.469000
191	00:00:07.508000
192	00:00:07.548000
193	00:00:07.587000
194	00:00:07.627000
195	00:00:07.666000
196	00:00:07.706000
197	00:00:07.745000
198	00:00:07.785000
199	00:00:07.824000
200	00:00:07.864000
201	00:00:07.903000
202	00:00:07.943000
203	00:00:07.983000
204	00:00:08.022000
205	00:00:08.062000
206	00:00:08.101000
207	00:00:08.140000
208	00:00:08.180000
209	00:00:08.219000
210	00:00:08.259000
211	00:00:08.299000
212	00:00:08.338000
213	00:00:08.378000
214	00:00:08.417000
215	00:00:08.457000
216	00:00:08.496000
217	00:00:08.536000
218	00:00:08.575000
219	00:00:08.615000
220	00:00:08.654000
221	00:00:08.694000
222	00:00:08.733000
223	00:00:08.773000
224	00:00:08.812000
225	00:00:08.852000
226	00:00:08.891000
227	00:00:08.931000
228	00:00:08.970000
229	00:00:09.010000
230	00:00:09.049000
231	00:00:09.089000
232	00:00:09.128000
233	00:00:09.168000
234	00:00:09.207000
235	00:00:09.247000
236	00:00:09.286000
237	00:00:09.326000
238	00:00:09.365000
239	00:00:09.405000
240	00:00:09.444000
241	00:00:09.484000
242	00:00:09.523000
243	00:00:09.563000
244	00:00:09.602000
245	00:00:09.642000
246	00:00:09.681000
247	00:00:09.721000
248	00:00:09.760000
249	00:00:09.800000
250	00:00:09.840000
251	00:00:09.879000
252	00:00:09.919000
253	00:00:09.958000
254	00:00:09.998000
255	00:00:10.037000
256	00:00:10.077000
257	00:00:10.116000
258	00:00:10.156000
259	00:00:10.195000
260	00:00:10.235000
261	00:00:10.274000
262	00:00:10.314000
263	00:00:10.353000
264	00:00:10.393000
265	00:00:10.432000
266	00:00:10.472000
267	00:00:10.511000
268	00:00:10.551000
269	00:00:10.590000
270	00:00:10.630000
271	00:00:10.669000
272	00:00:10.709000
273	00:00:10.748000
274	00:00:10.788000
275	00:00:10.827000
276	00:00:10.867000
277	00:00:10.906000
278	00:00:10.946000
279	00:00:10.985000
280	00:00:11.025000
281	00:00:11.064000
282	00:00:11.104000
283	00:00:11.143000
284	00:00:11.183000
285	00:00:11.222000
286	00:00:11.262000
287	00:00:11.302000
288	00:00:11.341000
289	00:00:11.381000
290	00:00:11.420000
291	00:00:11.460000
292	00:00:11.499000
293	00:00:11.539000
294	00:00:11.578000
295	00:00:11.618000
296	00:00:11.657000
297	00:00:11.697000
298	00:00:11.736000
299	00:00:11.776000
300	00:00:11.815000
301	00:00:11.855000
302	00:00:11.894000
303	00:00:11.934000
304	00:00:11.973000
305	00:00:12.013000
306	00:00:12.052000
307	00:00:12.092000
308	00:00:12.131000
309	00:00:12.171000
310	00:00:12.210000
311	00:00:12.250000
312	00:00:12.289000
313	00:00:12.329000
314	00:00:12.368000
315	00:00:12.408000
316	00:00:12.447000
317	00:00:12.487000
318	00:00:12.526000
319	00:00:12.566000
320	00:00:12.605000
321	00:00:12.645000
322	00:00:12.684000
323	00:00:12.724000
324	00:00:12.763000
325	00:00:12.803000
326	00:00:12.843000
327	00:00:12.882000
328	00:00:12.922000
329	00:00:12.961000
330	00:00:13
331	00:00:13.040000
332	00:00:13.079000
333	00:00:13.119000
334	00:00:13.159000
335	00:00:13.198000
336	00:00:13.238000
337	00:00:13.277000
338	00:00:13.317000
339	00:00:13.356000
340	00:00:13.396000
341	00:00:13.435000
342	00:00:13.475000
343	00:00:13.514000
344	00:00:13.554000
345	00:00:13.593000
346	00:00:13.633000
347	00:00:13.672000
348	00:00:13.712000
349	00:00:13.751000
350	00:00:13.791000
351	00:00:13.830000
352	00:00:13.870000
353	00:00:13.909000
354	00:00:13.949000
355	00:00:13.988000
356	00:00:14.028000
357	00:00:14.067000
358	00:00:14.107000
359	00:00:14.146000
360	00:00:14.186000
361	00:00:14.225000
362	00:00:14.265000
363	00:00:14.304000
364	00:00:14.344000
365	00:00:14.383000
366	00:00:14.423000
367	00:00:14.462000
368	00:00:14.502000
369	00:00:14.541000
370	00:00:14.581000
371	00:00:14.621000
372	00:00:14.660000
373	00:00:14.700000
374	00:00:14.739000
375	00:00:14.779000
376	00:00:14.818000
377	00:00:14.858000
378	00:00:14.897000
379	00:00:14.937000
380	00:00:14.976000
381	00:00:15.017000
382	00:00:15.056000
383	00:00:15.096000
384	00:00:15.135000
385	00:00:15.175000
386	00:00:15.214000
387	00:00:15.254000
388	00:00:15.293000
389	00:00:15.333000
390	00:00:15.372000
391	00:00:15.412000
392	00:00:15.451000
393	00:00:15.491000
394	00:00:15.530000
395	00:00:15.570000
396	00:00:15.609000
397	00:00:15.649000
398	00:00:15.688000
399	00:00:15.728000
400	00:00:15.767000
401	00:00:15.807000
402	00:00:15.846000
403	00:00:15.886000
404	00:00:15.925000
405	00:00:15.965000
406	00:00:16.004000
407	00:00:16.044000
408	00:00:16.083000
409	00:00:16.123000
410	00:00:16.163000
411	00:00:16.202000
412	00:00:16.242000
413	00:00:16.281000
414	00:00:16.321000
415	00:00:16.360000
416	00:00:16.400000
417	00:00:16.439000
418	00:00:16.479000
419	00:00:16.518000
420	00:00:16.558000
421	00:00:16.597000
422	00:00:16.637000
423	00:00:16.676000
424	00:00:16.716000
425	00:00:16.755000
426	00:00:16.795000
427	00:00:16.834000
428	00:00:16.874000
429	00:00:16.913000
430	00:00:16.953000
431	00:00:16.992000
432	00:00:17.032000
433	00:00:17.071000
434	00:00:17.111000
435	00:00:17.150000
436	00:00:17.190000
437	00:00:17.229000
438	00:00:17.269000
439	00:00:17.308000
440	00:00:17.348000
441	00:00:17.387000
442	00:00:17.427000
443	00:00:17.466000
444	00:00:17.506000
445	00:00:17.545000
446	00:00:17.585000
447	00:00:17.624000
448	00:00:17.664000
449	00:00:17.704000
450	00:00:17.743000
451	00:00:17.782000
452	00:00:17.822000
453	00:00:17.861000
454	00:00:17.901000
455	00:00:17.941000
456	00:00:17.980000
457	00:00:18.020000
458	00:00:18.059000
459	00:00:18.099000
460	00:00:18.138000
461	00:00:18.178000
462	00:00:18.217000
463	00:00:18.257000
464	00:00:18.296000
465	00:00:18.336000
466	00:00:18.375000
467	00:00:18.415000
468	00:00:18.454000
469	00:00:18.494000
470	00:00:18.533000
471	00:00:18.573000
472	00:00:18.612000
473	00:00:18.652000
474	00:00:18.691000
475	00:00:18.731000
476	00:00:18.770000
477	00:00:18.810000
478	00:00:18.849000
479	00:00:18.889000
480	00:00:18.928000
481	00:00:18.968000
482	00:00:19.007000
483	00:00:19.047000
484	00:00:19.086000
485	00:00:19.126000
486	00:00:19.165000
487	00:00:19.205000
488	00:00:19.244000
489	00:00:19.284000
490	00:00:19.323000
491	00:00:19.363000
492	00:00:19.402000
493	00:00:19.442000
494	00:00:19.482000
495	00:00:19.521000
496	00:00:19.561000
497	00:00:19.600000
498	00:00:19.640000
499	00:00:19.679000
500	00:00:19.719000
501	00:00:19.758000
502	00:00:19.798000
503	00:00:19.837000
504	00:00:19.877000
505	00:00:19.916000
506	00:00:19.956000
507	00:00:19.995000
508	00:00:20.035000
509	00:00:20.074000
510	00:00:20.114000
511	00:00:20.153000
512	00:00:20.193000
513	00:00:20.232000
514	00:00:20.272000
515	00:00:20.311000
516	00:00:20.351000
517	00:00:20.390000
518	00:00:20.430000
519	00:00:20.469000
520	00:00:20.509000
521	00:00:20.548000
522	00:00:20.588000
523	00:00:20.627000
524	00:00:20.667000
525	00:00:20.706000
526	00:00:20.746000
527	00:00:20.785000
528	00:00:20.825000
529	00:00:20.864000
530	00:00:20.904000
531	00:00:20.943000
532	00:00:20.983000
533	00:00:21.023000
534	00:00:21.062000
535	00:00:21.102000
536	00:00:21.141000
537	00:00:21.181000
538	00:00:21.220000
539	00:00:21.260000
540	00:00:21.299000
541	00:00:21.339000
542	00:00:21.378000
543	00:00:21.418000
544	00:00:21.457000
545	00:00:21.497000
546	00:00:21.536000
547	00:00:21.576000
548	00:00:21.615000
549	00:00:21.655000
550	00:00:21.694000
551	00:00:21.734000
552	00:00:21.773000
553	00:00:21.813000
554	00:00:21.852000
555	00:00:21.892000
556	00:00:21.931000
557	00:00:21.971000
558	00:00:22.010000
559	00:00:22.050000
560	00:00:22.089000
561	00:00:22.129000
562	00:00:22.168000
563	00:00:22.208000
564	00:00:22.247000
565	00:00:22.287000
566	00:00:22.326000
567	00:00:22.366000
568	00:00:22.405000
569	00:00:22.445000
570	00:00:22.485000
571	00:00:22.524000
572	00:00:22.564000
573	00:00:22.603000
574	00:00:22.642000
575	00:00:22.682000
576	00:00:22.721000
577	00:00:22.761000
578	00:00:22.801000
579	00:00:22.840000
580	00:00:22.880000
581	00:00:22.919000
582	00:00:22.959000
583	00:00:22.998000
584	00:00:23.038000
585	00:00:23.077000
586	00:00:23.117000
587	00:00:23.156000
588	00:00:23.196000
589	00:00:23.235000
590	00:00:23.275000
591	00:00:23.314000
592	00:00:23.354000
593	00:00:23.393000
594	00:00:23.433000
595	00:00:23.472000
596	00:00:23.512000
597	00:00:23.551000
598	00:00:23.591000
599	00:00:23.630000
600	00:00:23.670000
601	00:00:23.709000
602	00:00:23.749000
603	00:00:23.788000
604	00:00:23.828000
605	00:00:23.867000
606	00:00:23.907000
607	00:00:23.946000
608	00:00:23.986000
609	00:00:24.025000
610	00:00:24.065000
611	00:00:24.104000
612	00:00:24.144000
613	00:00:24.183000
614	00:00:24.223000
615	00:00:24.262000
616	00:00:24.302000
617	00:00:24.342000
618	00:00:24.381000
619	00:00:24.421000
620	00:00:24.460000
621	00:00:24.500000
622	00:00:24.539000
623	00:00:24.579000
624	00:00:24.618000
625	00:00:24.658000
626	00:00:24.697000
627	00:00:24.737000
628	00:00:24.776000
629	00:00:24.816000
630	00:00:24.855000
631	00:00:24.895000
632	00:00:24.934000
633	00:00:24.974000
634	00:00:25.014000
635	00:00:25.054000
636	00:00:25.093000
637	00:00:25.133000
638	00:00:25.172000
639	00:00:25.212000
640	00:00:25.251000
641	00:00:25.291000
642	00:00:25.330000
643	00:00:25.370000
644	00:00:25.409000
645	00:00:25.449000
646	00:00:25.488000
647	00:00:25.528000
648	00:00:25.567000
649	00:00:25.607000
650	00:00:25.646000
651	00:00:25.686000
652	00:00:25.725000
653	00:00:25.765000
654	00:00:25.805000
655	00:00:25.844000
656	00:00:25.884000
657	00:00:25.923000
658	00:00:25.963000
659	00:00:26.002000
660	00:00:26.042000
661	00:00:26.081000
662	00:00:26.121000
663	00:00:26.160000
664	00:00:26.200000
665	00:00:26.239000
666	00:00:26.279000
667	00:00:26.318000
668	00:00:26.358000
669	00:00:26.397000
670	00:00:26.437000
671	00:00:26.476000
672	00:00:26.516000
673	00:00:26.555000
674	00:00:26.595000
675	00:00:26.634000
676	00:00:26.674000
677	00:00:26.713000
